## Appendix.

Members of the Lundbeck Foundation Centre for Fast-track Hip and Knee Replacement Collaborative Group are the following: Kjeld Soeballe, D.M.Sci., Department of Orthopedics, Aarhus University Hospital, Aarhus University, Aarhus, Denmark; Torben B. Hansen, D.M.Sci., Department of Orthopedics, Regional Hospital Holstebro, Aarhus University, Aarhus, Denmark; Henrik Husted, D.M.Sci., Orthopedic Department, Hvidovre University

Hospital, Copenhagen University, Copenhagen, Denmark; Mogens B. Laursen, Ph.D., Orthopedic Division, Aalborg Hospital, Aalborg University, Aalborg, Denmark; Lars T. Hansen, M.D., Orthopedic Department, Sydvestjysk Hospital Esbjerg/Grindsted, Esbjerg, Denmark; Per Kjærsgaard-Andersen, M.D., Department of Orthopedics, Vejle Hospital, University of Southern Denmark, Odense, Denmark; and Søren Solgaard, D.M.Sci., Department of Orthopedics, Gentofte University Hospital, Hellerup, Denmark.

## ANESTHESIOLOGY REFLECTIONS FROM THE WOOD LIBRARY-MUSEUM

### F. A. Sweetland's "Liquid Nitrous Oxide" Trade Card

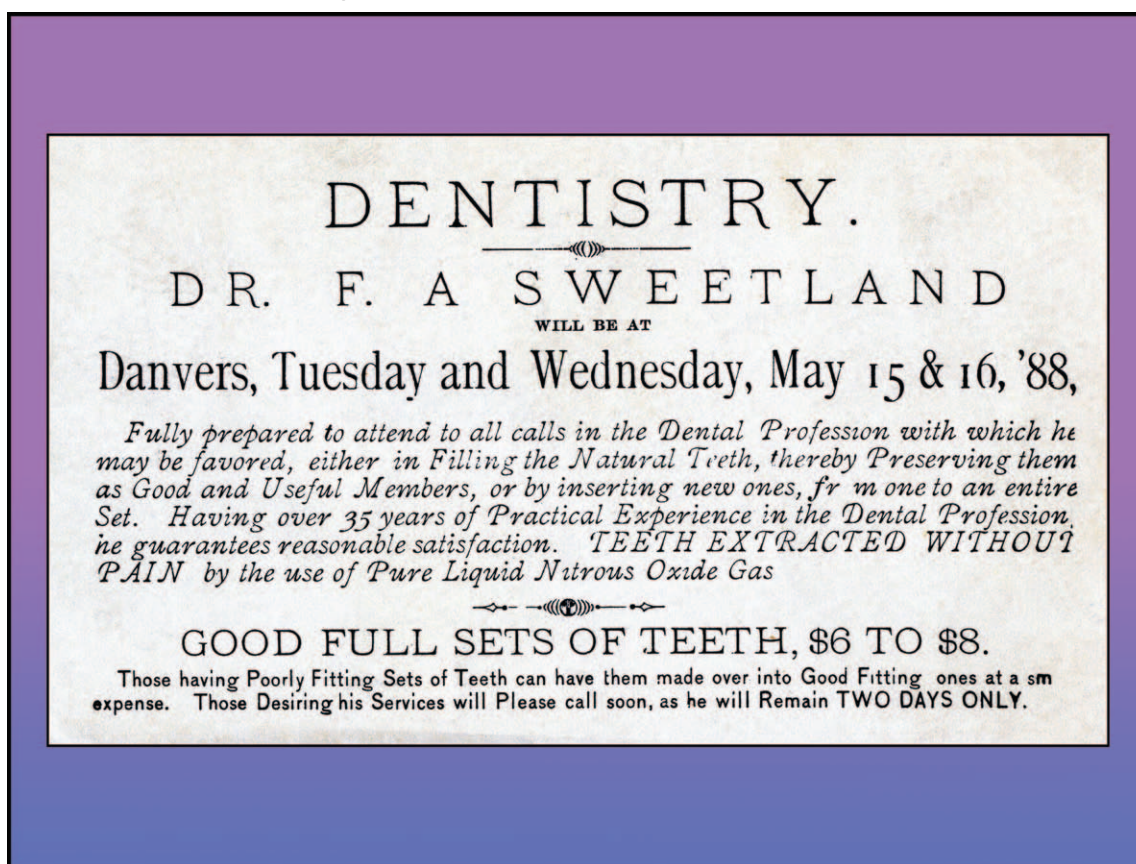

A native of Dryden, New York, Dr. Frederick Augustus "Fred" Sweetland (1827–1908) was a dentist who practiced most of his later years about 150 miles southwest of Chicago, in Wyoming, Illinois. On his trade card (above), Sweetland advertised in May of 1888 that he would travel the 65 miles southeast in Illinois, from Wyoming to Danvers, and offer "TEETH EXTRACTED WITHOUT PAIN by the use of Pure Liquid Nitrous Oxide Gas." During the quarter century after laughing gas had been repopularized for dental anesthesia, the rising tide of postanesthetic complications were blamed frequently upon administration of impure nitrous oxide to patients. By using newer technology for furnishing "gas" from tanks filled with pure, condensed (liquid) nitrous oxide, a dental or medical practitioner could reassure patients that they were receiving safer "Pure Liquid Nitrous Oxide Gas." (Copyright © the American Society of Anesthesiologists, Inc.)

George S. Bause, M.D., M.P.H., Honorary Curator, ASA's Wood Library-Museum of Anesthesiology, Schaumburg, Illinois, and Clinical Associate Professor, Case Western Reserve University, Cleveland, Ohio. UJYC@aol.com.
